# Supplementary material
Source: Springer Nature journal article supplement (https://www.springermedizin.de/resource/supplementary/12968_2013_3341_MOESM6_ESM.pdf/9583666)

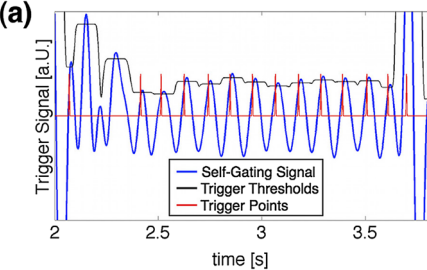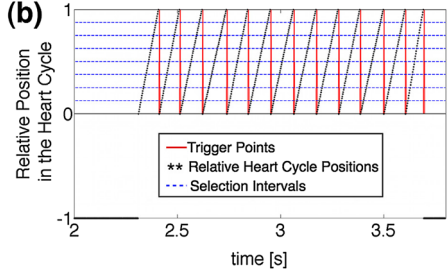

Supplement: MOESM6 [file 9583666]
